# Supplementary material for: A New Thermo-Responsive Hyaluronic Acid Sol-Gel to Prevent Intrauterine Adhesions after Hysteroscopic Surgery: A Randomized, Non-Inferiority Trial
Source: PubMed Central journal article supplement — Yonsei Med J. 2020 Sep 22;61(10):868–74. doi: 10.3349/ymj.2020.61.10.868 (PMC7515784; doi:10.3349/ymj.2020.61.10.868), 2020-09-22
Supplement: ymj-61-868-s001.pdf [file ymj-61-868-s001.pdf]

**Supplementary Table 1.** American Fertility Society Score for Intrauterine Adhesions

| <b>Variable</b>                           | <b>Characteristic</b> | <b>Score</b> |
|-------------------------------------------|-----------------------|--------------|
| Extent of cavity involved (adhesion area) | <1/3                  | 1            |
|                                           | 1/3 to 2/3            | 2            |
|                                           | >2/3                  | 4            |
| Type of adhesion                          | Filmy                 | 1            |
|                                           | Filmy and dense       | 2            |
|                                           | Dense                 | 4            |
